# Supplementary material for: Rho/SRF Inhibitor Modulates Mitochondrial Functions
Source: MDPI journal article supplement (doi:10.3390/ijms231911536), 2022-09-29
Supplement: s1 [file s1]

## Supplementary Data

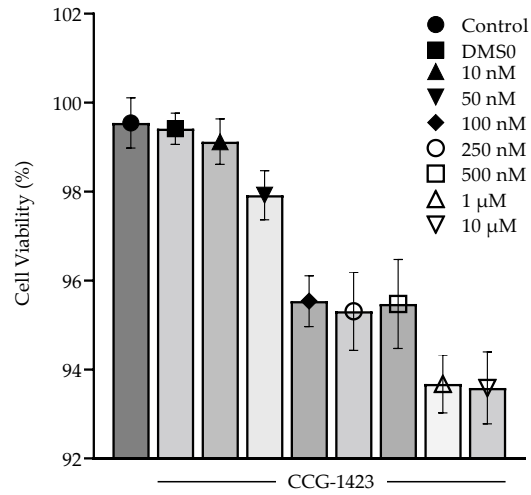

**Supplementary Figure S1.** MTS assay was performed on C2C12 cells treated with vehicle or different concentrations of CCG-1423 (10 nM - 10  $\mu$ M) for 24 h, which showed, that CCG-1423 does not affect on the cell viability.

**A**

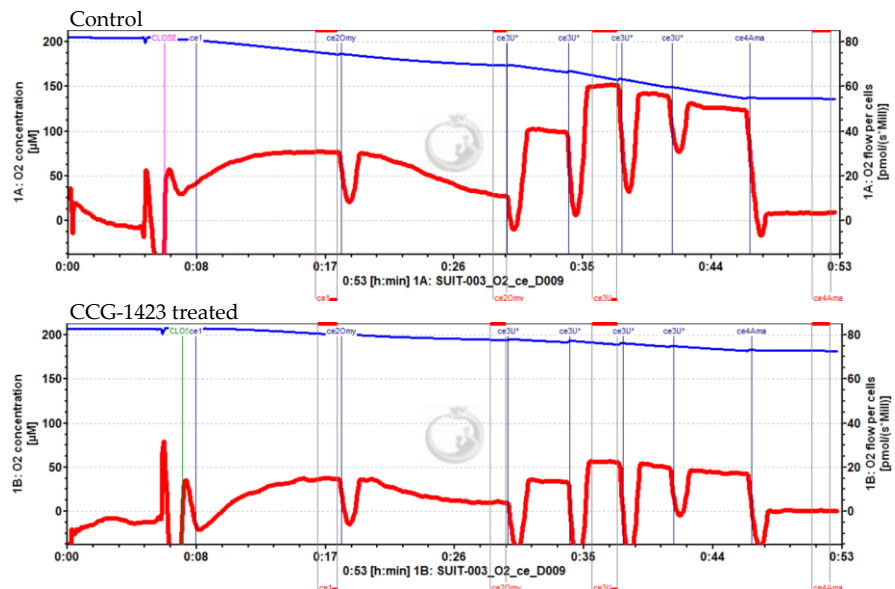

**B**

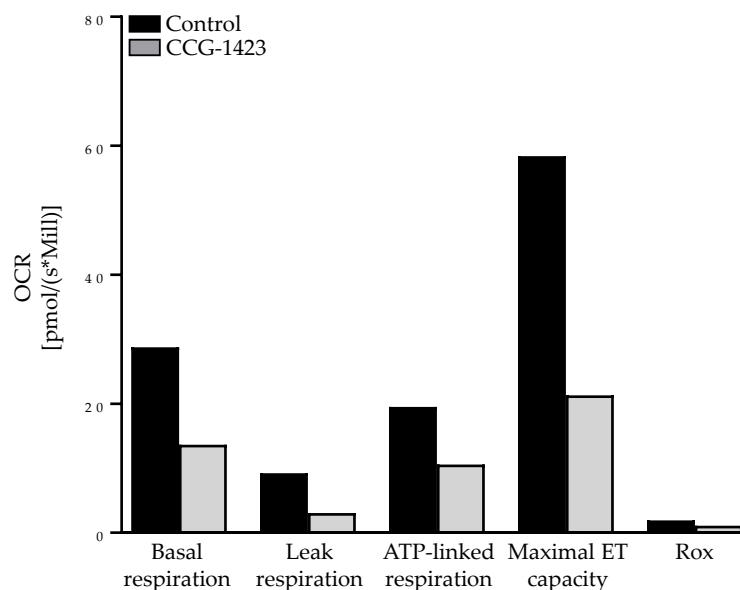

**Supplementary Figure S2.** High-resolution respiratory analysis of oxidative phosphorylation A) Representative images of Oxygraph at O2K of intact H9C2 cells treated with CCG-1423 with 10  $\mu$ M for 24h. B) Oxygen consumption rate (OCR) and basal respiration, leak respiration, ATP-linked respiration, Maximum ET capacity was analyzed after the treatment of CCG-1423 and compared with non-treated H9C2 cells in Oroboros O2K instrument.

**Supplement Table S1.** List of primer sequences used for qPCR analysis.

| Name                              | Primer Sequence (5' - 3') |
|-----------------------------------|---------------------------|
| <i>SRF-F</i>                      | CTACACGACCTTCAGCAAGAG     |
| <i>SRF-R</i>                      | GTATACACATGGCCTGTCTCAC    |
| <i>p49/STRAP-F</i>                | GGGACTCTGAACCTCAATAACG    |
| <i>p49/STRAP-R</i>                | ACACTCCTGACAAGTTTTTCGG    |
| <i>PGC-1<math>\alpha</math>-F</i> | ATTCGGGAGCTGGATGGCTT      |
| <i>PGC-1<math>\alpha</math>-R</i> | AGCAGCACACTCTATGTCACTC    |
| <i>PGC-1<math>\beta</math> -F</i> | CAGGGTGGGGACTCTGGA        |
| <i>PGC-1<math>\beta</math> -R</i> | AGTCAAAGTCACTGGCGTCC      |
| <i>MFN1-F</i>                     | ACCCCATGAAGACTAGGCGA      |
| <i>MFN1-R</i>                     | ACCCCATGAAGACTAGGCGA      |
| <i>MFN2-F</i>                     | GGACAGCCACTTAGGGAACC      |
| <i>MFN2-R</i>                     | GTCCTGGTAGGCAAAGACCC      |
| <i>Fis1-F</i>                     | CGCTACGGAGAAAAACCAAAGA    |
| <i>Fis1-R</i>                     | TTCAAATTCCTTGCAGCTTCG     |
| <i>Opa1-F</i>                     | TACTGTTAGCCCCGAGACCA      |

|                   |                          |
|-------------------|--------------------------|
| <i>Opa1</i> -R    | GATGACACCAGGCAAGTCCA     |
| <i>NDUFV1</i> -F  | AAGCCATCGCTCGTCTCAT      |
| <i>NDUFV1</i> -R  | TTCATCCAGTCAACGCCCTC     |
| <i>NDUFV2</i> -F  | TCFFTTTGCTTATTCCCACCT    |
| <i>NDUFV2</i> -R  | GACCGAGATAGTGGTCCTGT     |
| <i>NDUFAB1</i> -F | ACATTGCAGATAAGAAGGATGTGT |
| <i>NDUFAB1</i> -R | TCACTCTTGCTTGTCAAGTGTGT  |
| <i>NDUFS1</i> -F  | CAGGGGCTGCTTACACAGAA     |
| <i>NDUFS1</i> -R  | AGGCGTCACTGCTACTTTGG     |

F, forward primer; R, reverse primer.
